# Supplementary material
Source: Research Square preprint supplement (doi:10.21203/rs.3.rs-9689757/v1)
Supplement: Supplementary file 1 [file eb4d86a4d857239718fff9b3.docx]

**
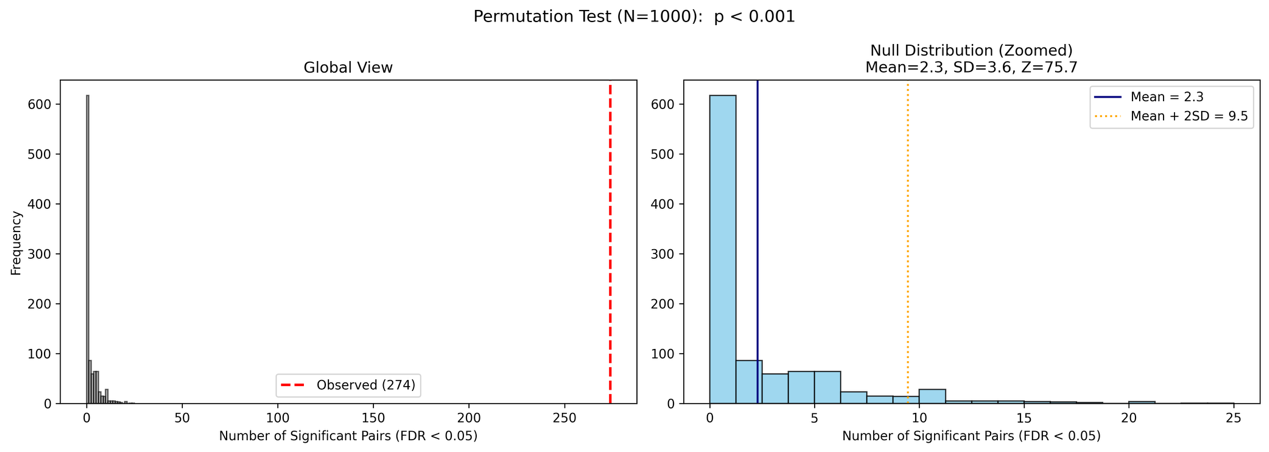
**

**Fig. S1. Permutation test validating biological specificity of identified dependencies.**

**Left panel (global view): Histogram of significant pair counts across 1,000 label-permutation iterations, with the observed value (274 pre-selectivity-filtered pairs) shown as a red dashed line. Right panel (zoomed null distribution): The null distribution is concentrated near zero (mean = 2.3, SD = 3.6, maximum = 25), yielding an empirical p-value < 0.001 and Z-score = 75.7, supporting the interpretation that identified dependencies are not attributable to label-permutation artifacts. The permutation benchmark was performed on the pre-stringency-filter candidate set (274 pairs), supporting the overall specificity of the statistical framework prior to the final selectivity refinement step.**

**
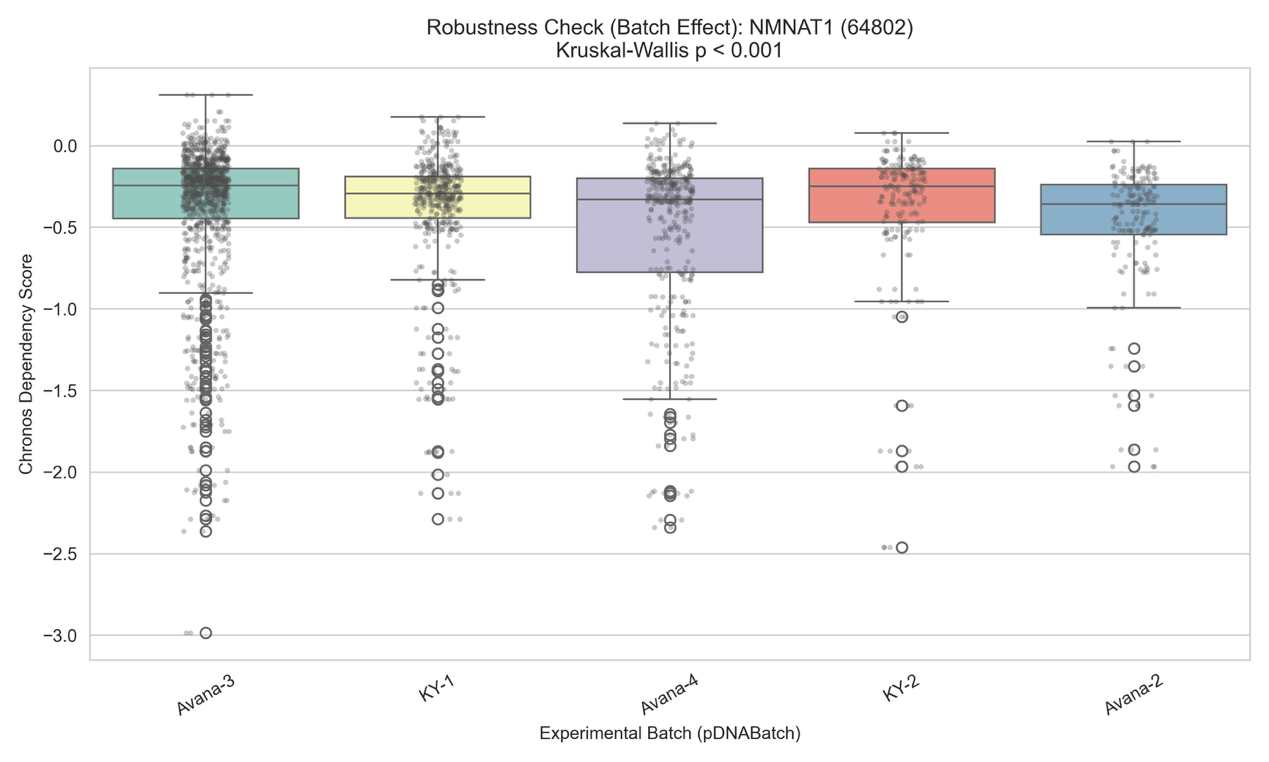
**

**Fig. S2. Batch effect assessment for NMNAT1 across experimental batches.**

**Boxplots with individual data points showing the distribution of NMNAT1 (Entrez ID 64802) Chronos scores across the five major DepMap experimental batches (pDNABatch: Avana-3, KY-1, Avana-4, KY-2, Avana-2). Although the Kruskal-Wallis test detected statistically significant between-batch differences (p = 1.22 × 10⁻¹⁶), the effect size was small (η² = 0.036, indicating that batch variation accounts for approximately 3.6% of total score variance), and median dependency scores across batches fell within a narrow range (approximately −0.25 to −0.35), suggesting that batch variation is unlikely to materially confound the identified lineage-specific dependency signals..**

**
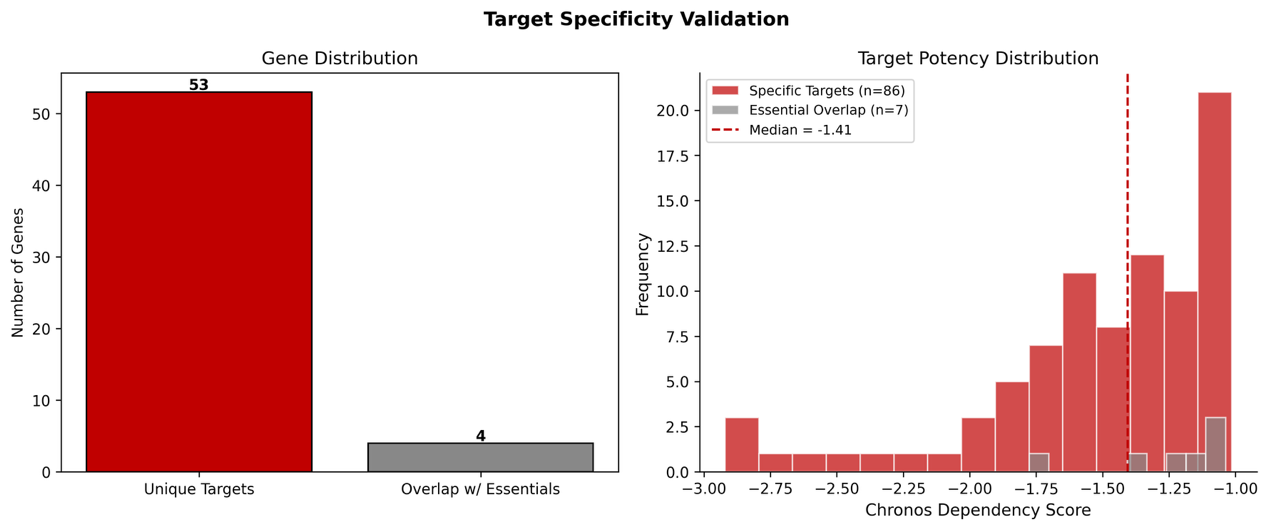
**

**Fig. S3. Comparison of target genes against DepMap Common Essentials.**

**Left panel: Bar chart showing unique target genes with no overlap with Common Essentials (n = 53 genes, red) versus genes overlapping with the Common Essentials list (n = 4 genes, grey). Note that the 4 overlapping genes correspond to 7 gene–lineage pairs, as some genes are associated with dependencies in more than one lineage. Right panel: Histogram of Chronos dependency scores for lineage-specific dependency pairs from non-overlapping genes (n = 86 pairs, red) and pairs involving genes with any Common Essential overlap (n = 7 pairs, grey). The low gene-level overlap rate (4/57, 7%) and median Chronos score of −1.41 are consistent with the interpretation that identified targets represent lineage-restricted rather than universally cytotoxic vulnerabilities.**

**
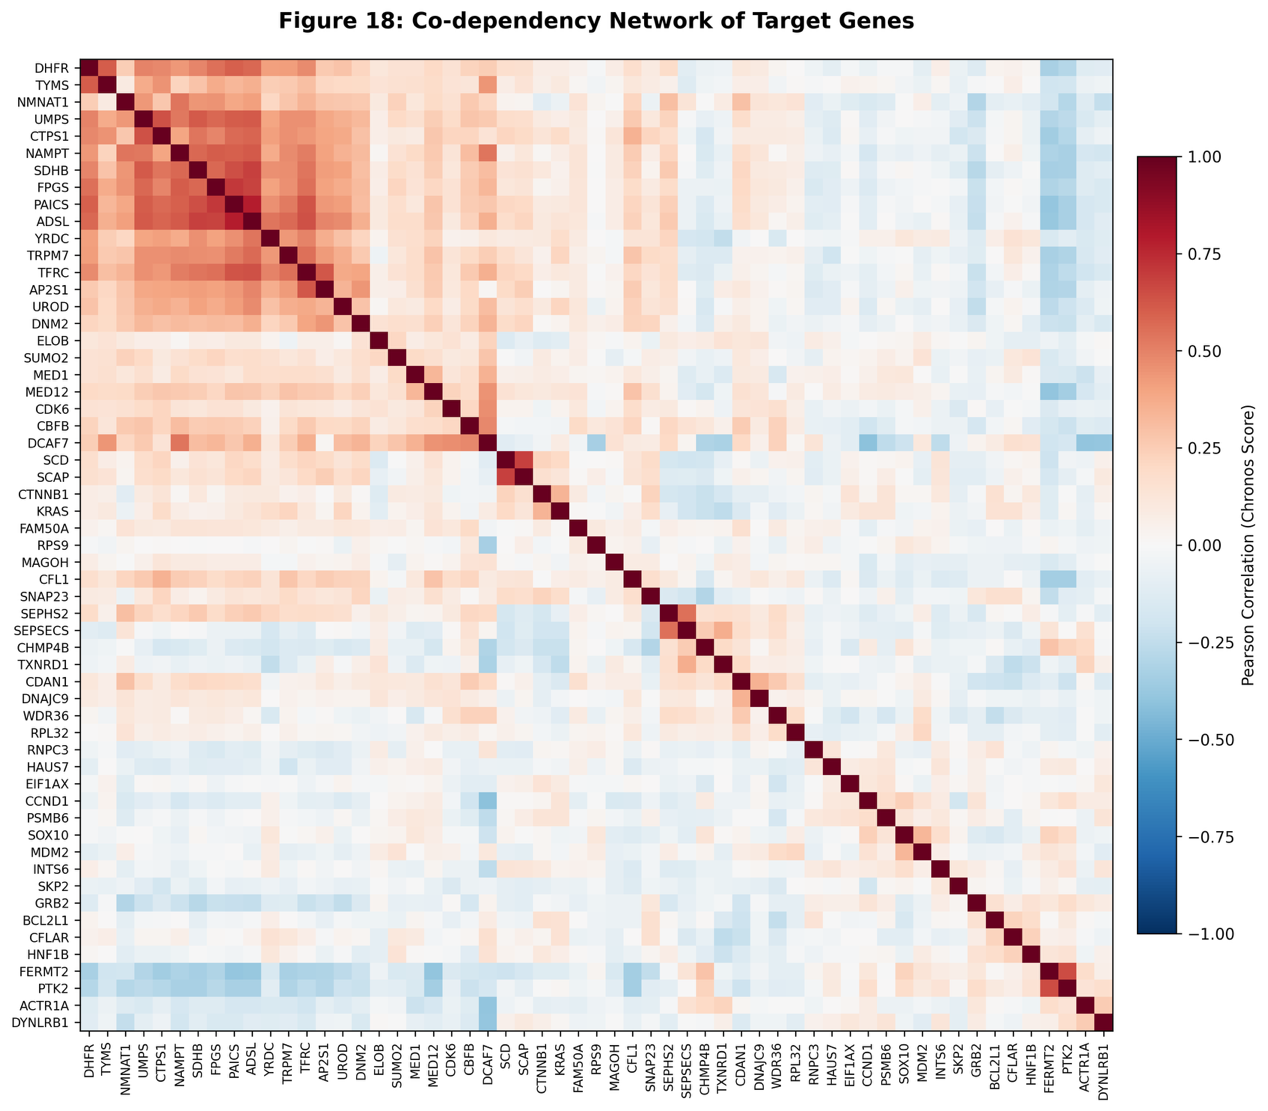
**

**Fig. S4. Co-dependency heatmap of 57 lineage-specific target genes.**

**Pearson correlation matrix of Chronos scores across 1,208 cell lines for all 57 unique target genes, ordered by hierarchical clustering (Ward linkage). A prominent metabolic gene module is evident in the upper-left cluster, comprising DHFR, TYMS, NMNAT1, UMPS, CTPS1, NAMPT, SDHB, FPGS, PAICS, ADSL, and YRDC (Pearson r > 0.5). A functionally distinct cluster including SOX10, MDM2, CCND1, and PSMB6 shows low or negative correlations with the metabolic module, indicating mechanistically independent lineage-specific vulnerability programs. Color scale: red = positive correlation, blue = negative correlation.**

**
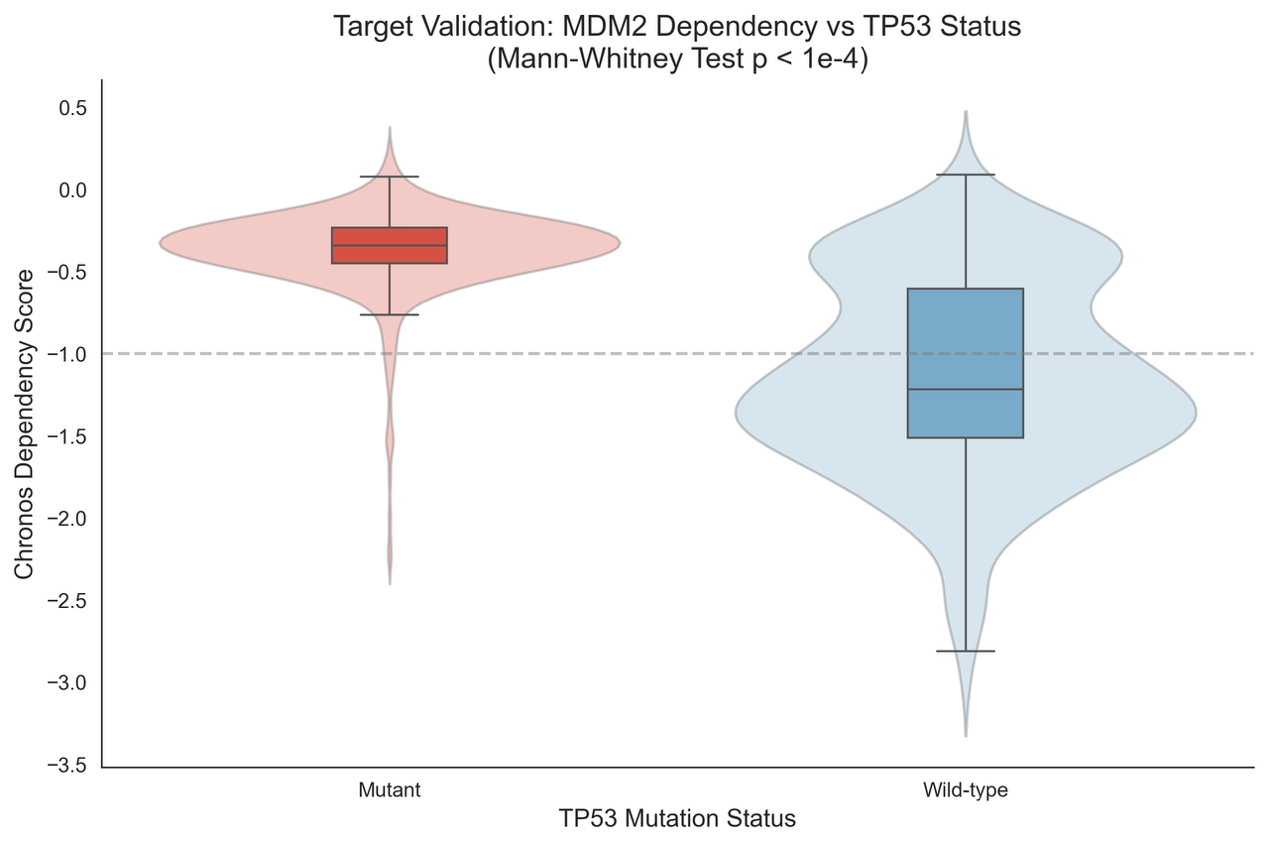
**

**Fig. S5. MDM2 dependency stratified by TP53 mutation status.**

**Violin plots with embedded boxplots showing MDM2 Chronos dependency scores in TP53-mutant versus TP53 wild-type cell lines, based on OmicsSomaticMutations data. TP53 wild-type cells exhibit significantly deeper MDM2 dependency (lower Chronos scores, median ≈ −1.1) compared to TP53-mutant cells (median ≈ −0.35; Mann-Whitney p < 1 × 10⁻⁴). This result is mechanistically consistent with known TP53 biology: in TP53 wild-type cancers, MDM2 is the primary suppressor of p53-mediated apoptosis, rendering these cells highly dependent on MDM2 activity. Dashed line indicates the essentiality threshold (Chronos = −1.0).**


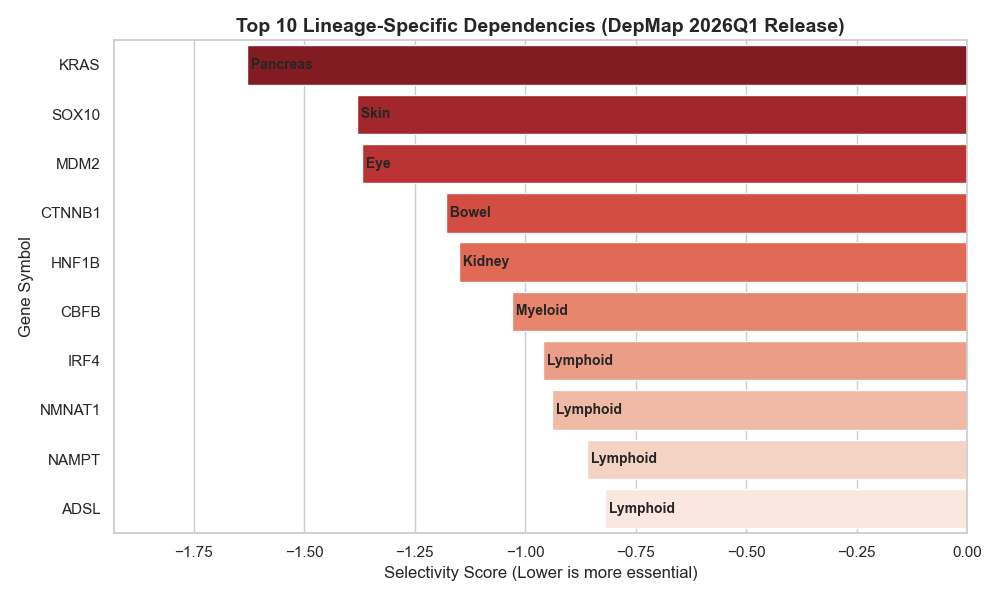


**Fig. S6. Top 10 lineage-specific dependencies from DepMap 26Q1 release.**

**Horizontal bar chart displaying the 10 gene--lineage pairs with the strongest selectivity scores (most negative) among the 93 high-confidence pairs identified in this study. Bar color gradient (dark red to light red) reflects selectivity magnitude. Lineage labels are shown within each bar. KRAS (Pancreas, selectivity = −1.63) ranks first, followed by SOX10 (Skin) representing an established lineage-defining transcription factor, and MDM2 (Eye) reflecting a TP53-related dependency in uveal melanoma. NMNAT1, NAMPT, IRF4, and ADSL in Lymphoid lineage reflect the coordinated NAD and nucleotide metabolism vulnerability of hematological malignancies.**

Table 1. High-confidence gene–lineage essentiality pairs identified by selectivity-based screening.

The table summarizes the top-ranked gene–lineage dependency pairs (Confidence: High/Medium). Selectivity scores represent the degree of lineage-restricted growth inhibition relative to the pan-cancer median Chronos score. P-values were adjusted using the Benjamini–Hochberg procedure (BH-FDR). (See Supplementary Table S1 for the full list of 93 pairs.)

Table 2. Clinical and survival metadata of the TCGA-PAAD cohort for dependency validation.

Note: This table presents the comprehensive clinical follow-up records for 183 patients with pancreatic adenocarcinoma (PAAD) obtained from the TCGA database.

Abbreviations: OS, Overall Survival; DSS, Disease-Specific Survival; DFI, Disease-Free Interval; PFI, Progression-Free Interval.

Data Integrity: Columns containing empty cells (particularly DFI and DFI.time) represent cases where specific clinical endpoints were not achieved (e.g., patients who did not reach a disease-free state post-treatment) or instances of incomplete longitudinal follow-up.

Usage: These data served as the clinical gold standard for validating the impact of identified lineage-specific dependency genes on patient prognosis using Kaplan-Meier survival analysis.
